# Supplementary material
Source: PubMed Central journal article supplement (PMC5914477)
Supplement: cb8b00072_si_001.pdf [file cb8b00072_si_001.pdf]

## Supporting Information

# DNA Polymerase $\theta$ Increases Mutational Rates in Mitochondrial DNA

Simon Wisnovsky<sup>a</sup>, Tanja Sack<sup>c</sup>, David J. Pagliarini<sup>d,e</sup>, Rebecca R. Laposab<sup>\*</sup>, Shana O. Kelley<sup>a,c\*</sup>

<sup>a</sup>Department of Biochemistry, University of Toronto, Toronto, Canada <sup>b</sup>Department of Pharmacology, University of Toronto, Toronto, Canada <sup>c</sup>Department of Pharmaceutical Sciences, University of Toronto, Toronto, Canada

<sup>d</sup>Morgridge Institute for Research, Madison, WI 53715, USA <sup>e</sup>Department of Biochemistry, University of Wisconsin–Madison, Madison, WI 53706, USA

\*Correspondence: rebecca.laposa@utoronto.ca, shana.kelley@utoronto.ca

**a**

Mitochondria

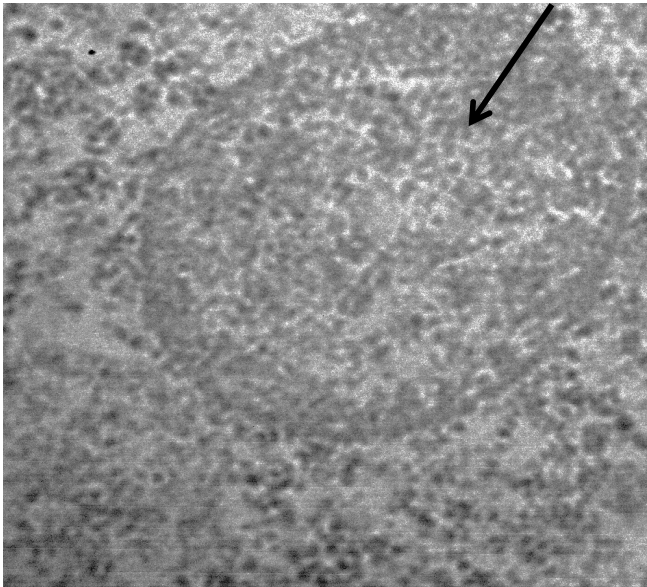

**b**

Mitochondria

Nucleus

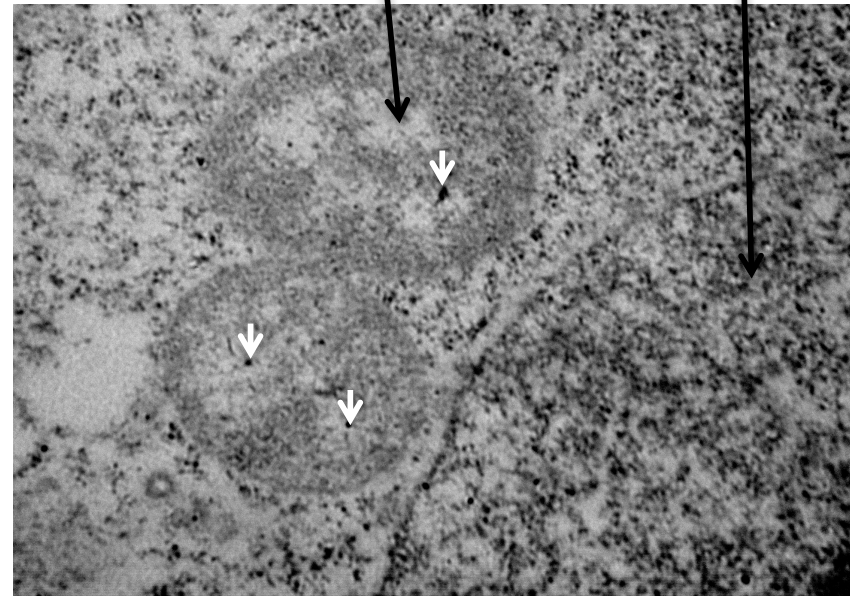

**Supporting Figure 1.** a) Immunogold labeling of mitochondria from untransfected cells shows minimal non-specific staining b) POLθ localizes in the mitochondrial matrix by immunogold electron microscopy. Punctate gold staining indicated with arrows. Lighter, less membrane dense regions correspond to the mitochondrial matrix. Images are at 30,000x magnification

POLQ-DeIMTS

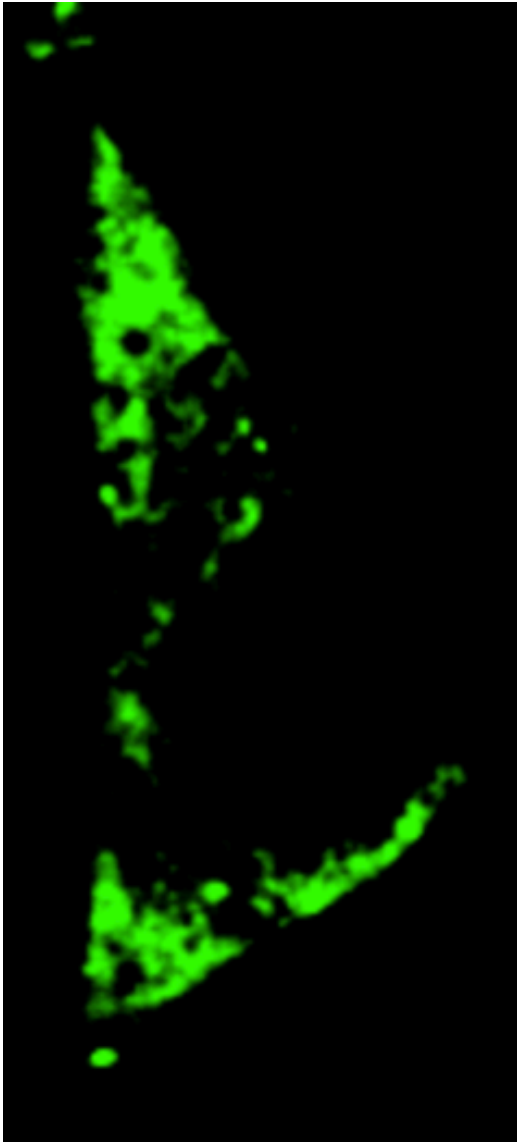

MTCO2

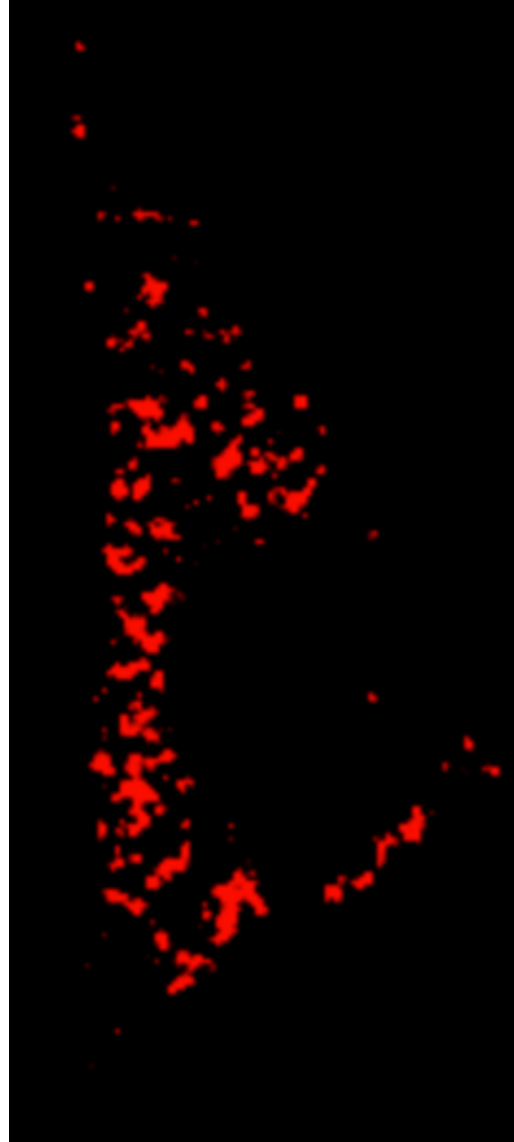

Merge

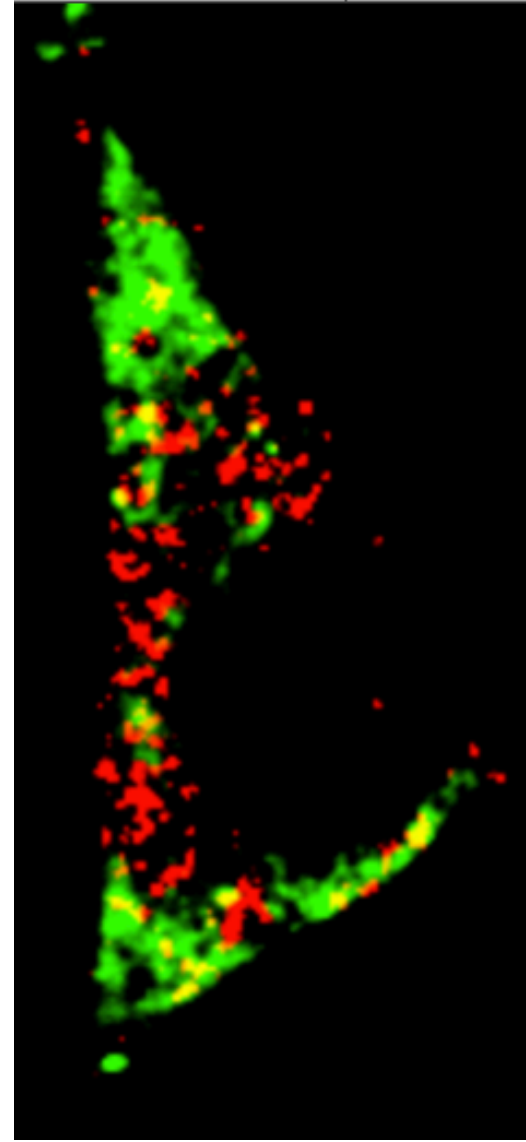

**Supporting Figure 2.** POLQ-delIMTS (POLQ cDNA lacking MNLLRRSGKRRRS leader sequence) localizes shows diffuse cytosolic staining. Mitochondria were stained with an MTCO2 antibody.

Hoechst 33342

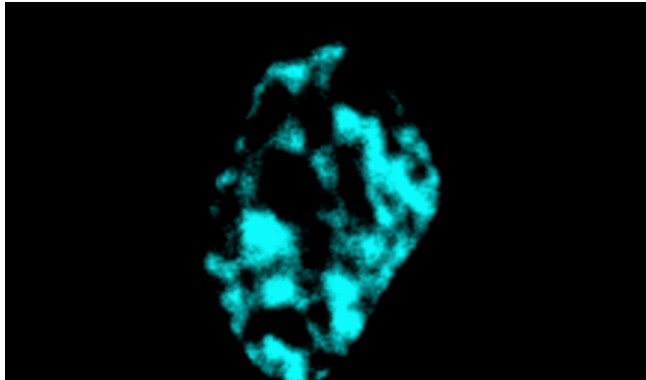

Anti-FLAG

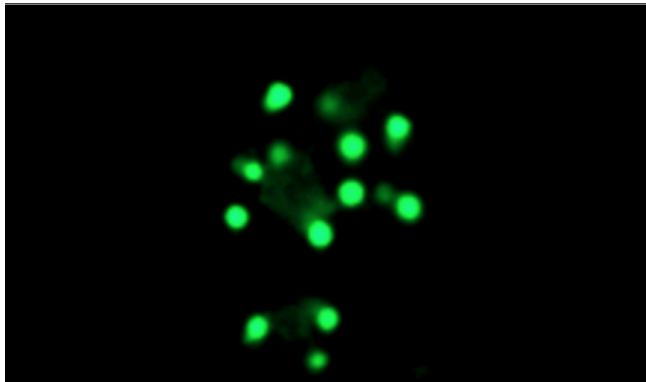

Merge

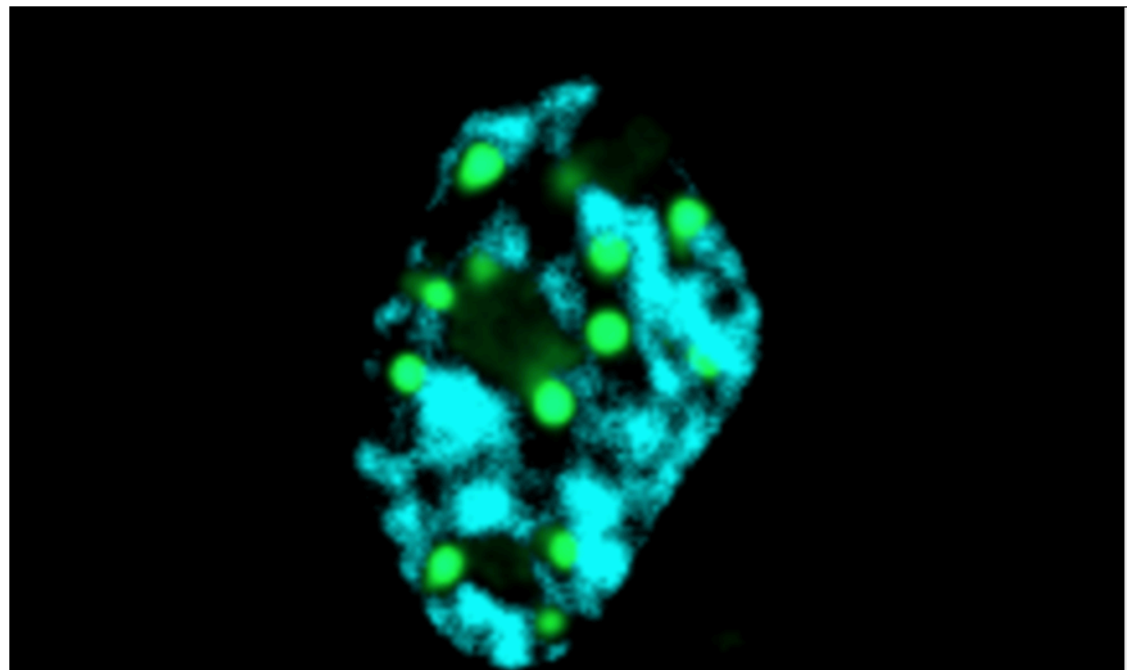

**Supporting Figure 3.** POLQ-NLS localizes solely to the nucleus. Cell nuclei were stained with Hoechst 33342.
